# Supplementary material
Source: PubMed Central journal article supplement (PMC8669274)
Supplement: sj-pdf-1-jcb-10.1177_0271678X211031035.pdf [file sj-pdf-1-jcb-10.1177_0271678X211031035.pdf]

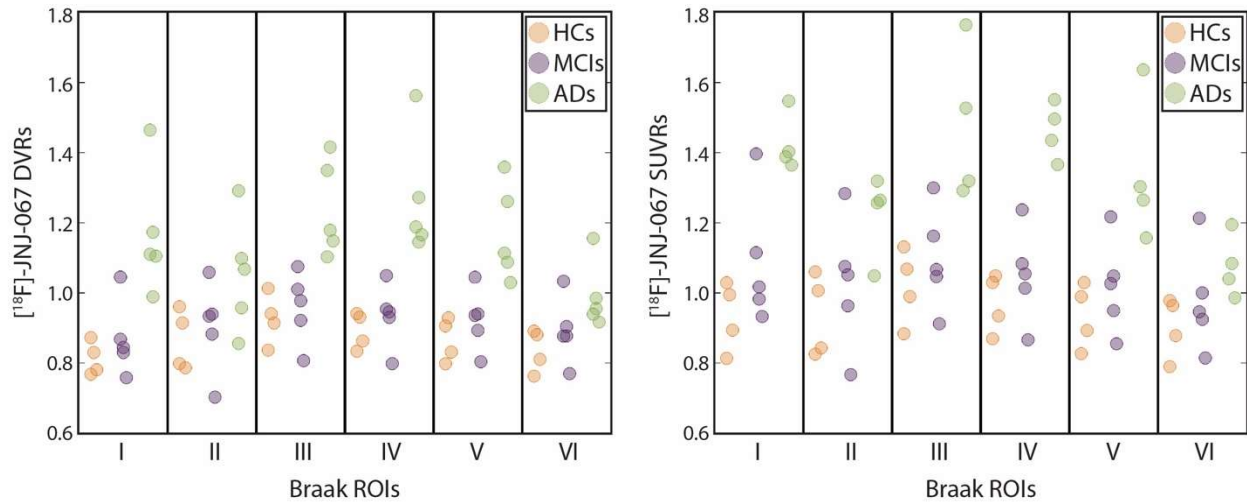

**Supplementary Figure 1:** DVR and SUVR 70-90 min mean values for Braak I-VI ROIs in healthy controls (orange), MCI (purple) and AD (green) participants where Braak I ROI is entorhinal cortex, Braak II ROI is hippocampus, Braak III ROI is parahippocampal, fusiform, amygdala and lingual cortices, Braak IV ROI is insula, cingulate, middle and inferior temporal cortices and temporal pole, Braak V ROI is frontal, lateral occipital, parietal, superior and transverse temporal, banks of superior temporal sulcus, and precuneus, and Braak VI ROI is primary motor and somatosensory cortex, pericalcarine cortex and cuneus. AD4 participant had to end [18F]-JNJ-067 scan at 67 min and therefore we could not calculate SUVR 70-90 min for that participant.

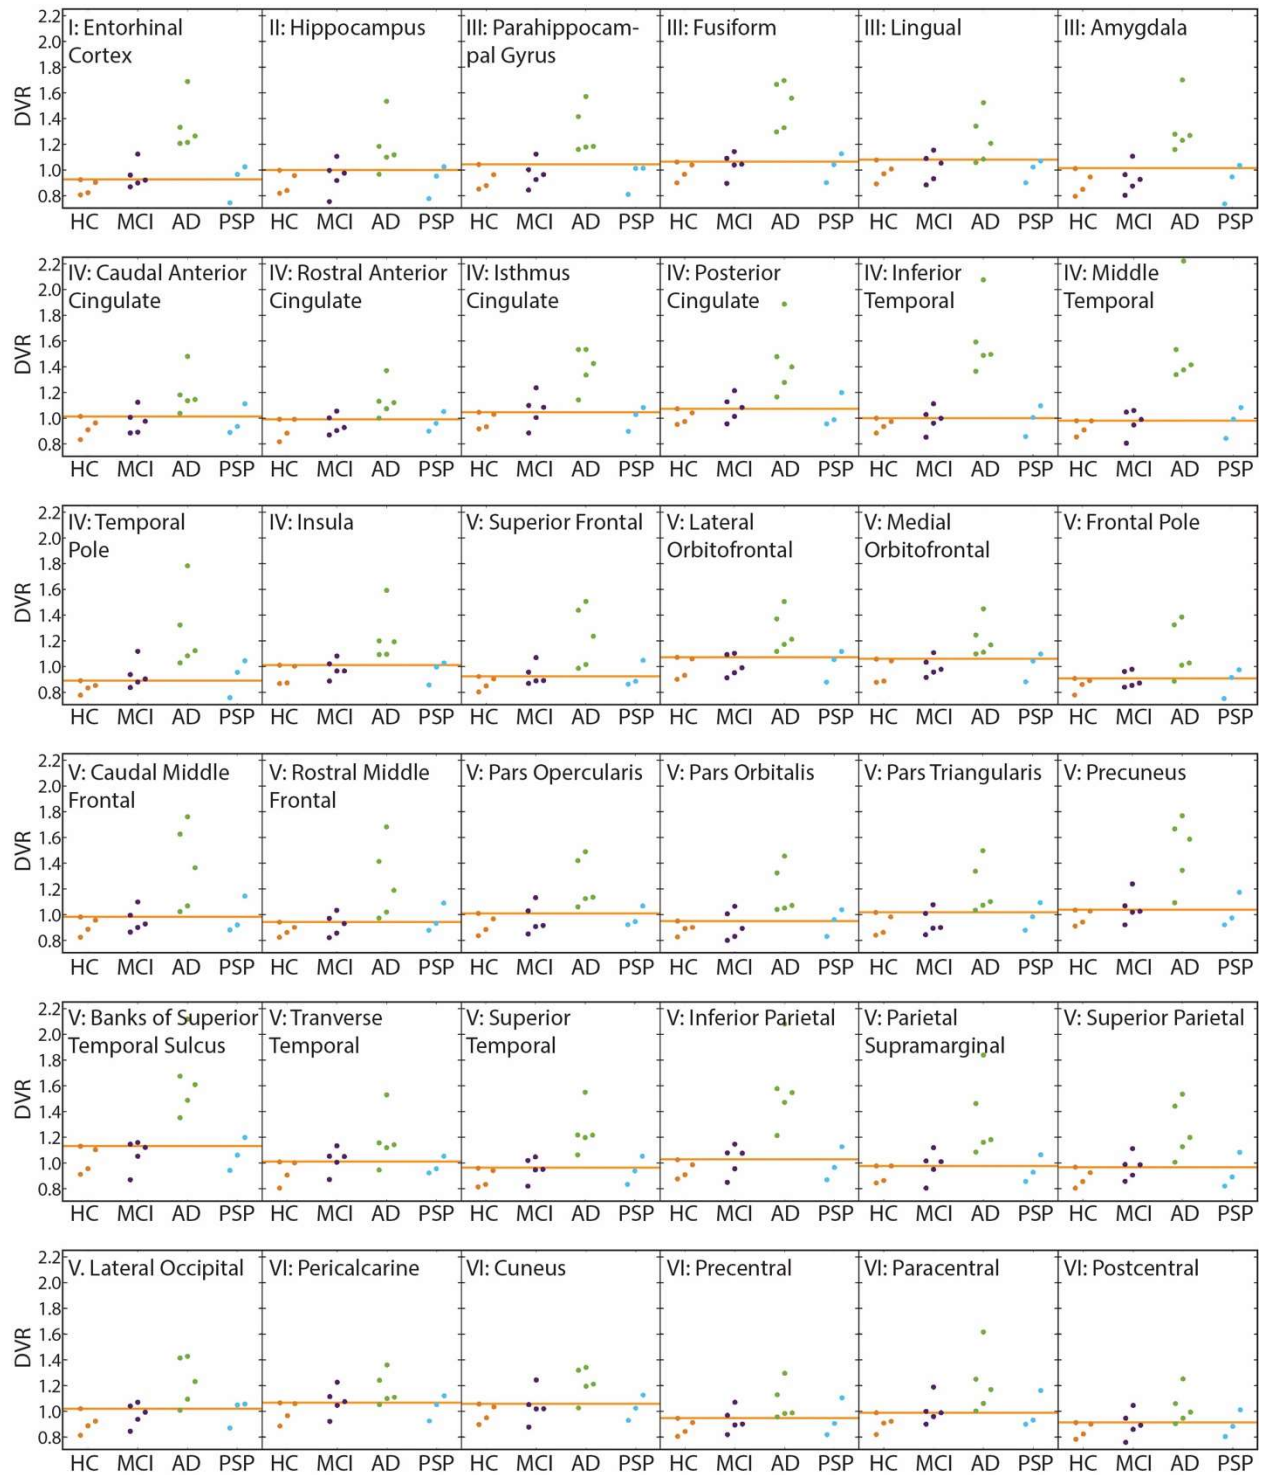

**Supplementary Figure 2:** Mean [<sup>18</sup>F]-JNJ-067 DVR values using inferior cerebellar gray as

reference region for all ROIs. ROIs are labeled with Braak region preceding name of ROI.

Orange line represents highest DVR value for that ROI within healthy control group.

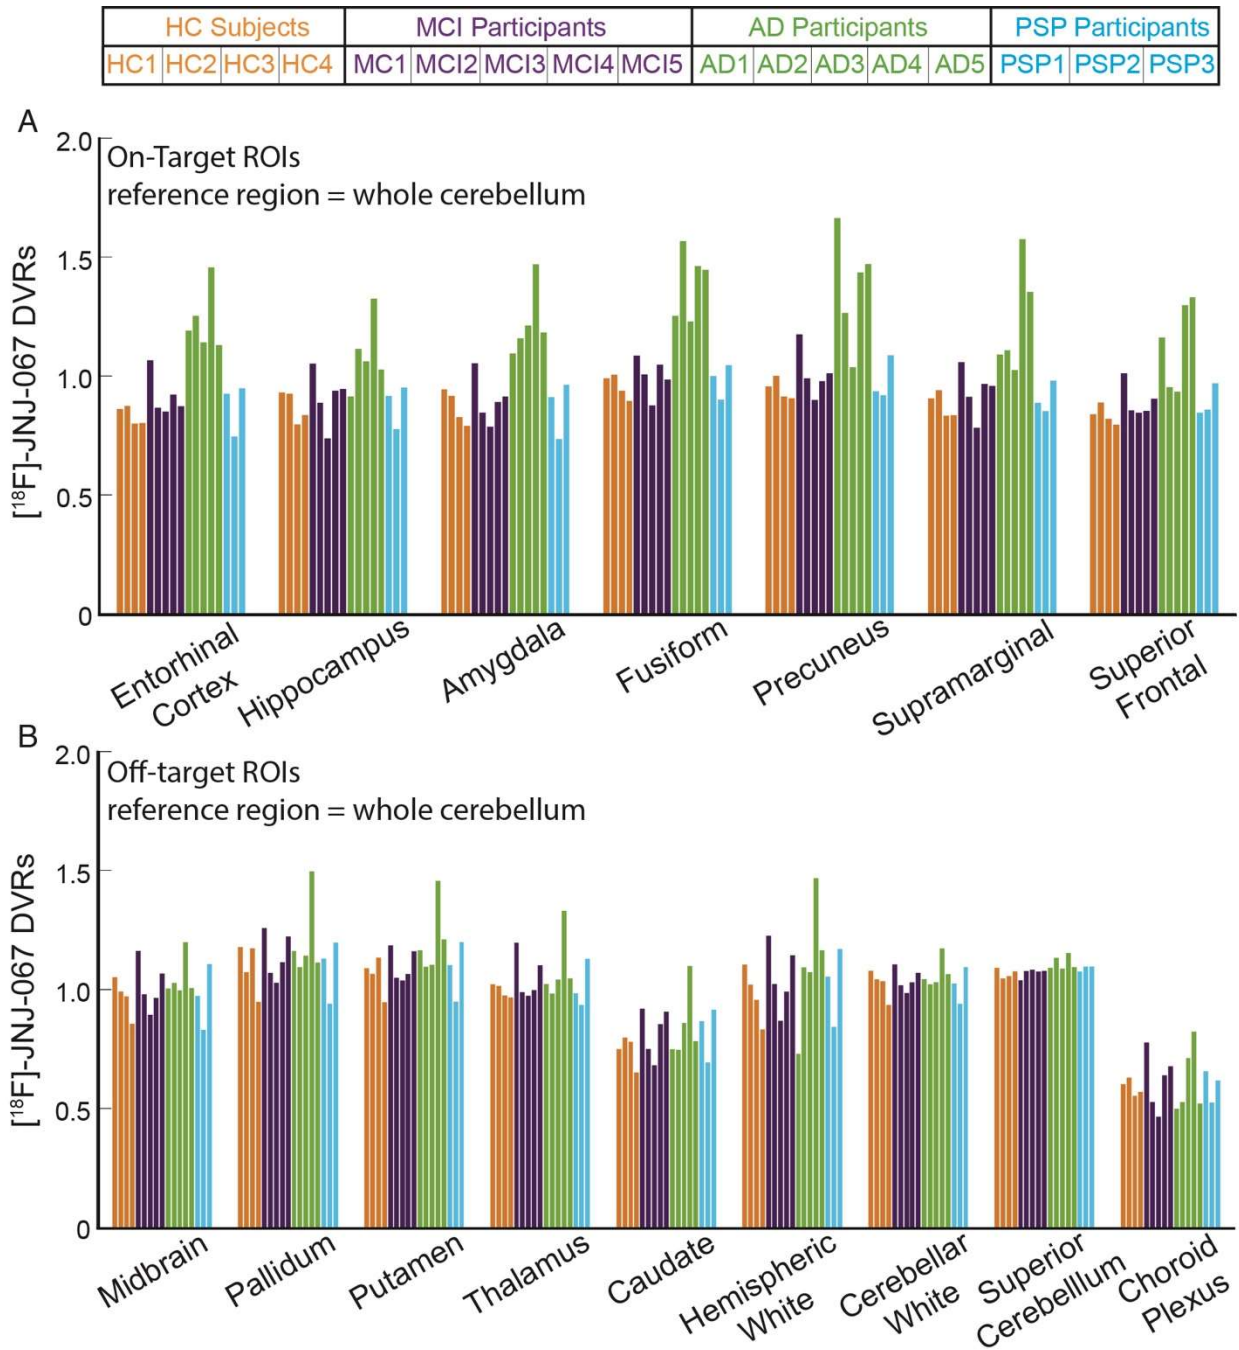

**Supplementary Figure 3:** Mean  $[^{18}\text{F}]\text{-JNJ-067}$  DVR values using whole cerebellum as reference region. Bars are ordered by HC (orange), MCI (purple), AD (green), and PSP (blue) subjects, and ordered within diagnosis group by increasing PIB SUVR index (as in Table 1). A. On-target ROIs and B. Off-target ROIs.

Supplementary Table 1

|                                   | DVR reference = inferior cerebellar gray |         | DVR reference = whole cerebellum |         |
|-----------------------------------|------------------------------------------|---------|----------------------------------|---------|
|                                   | AD>HC                                    | AD>MCI  | AD>HC                            | AD>MCI  |
| <b>Braak I ROI</b>                |                                          |         |                                  |         |
| Entorhinal Cortex                 | p<0.001                                  | p<0.001 | p<0.001                          | p<0.001 |
| <b>Braak II ROI</b>               |                                          |         |                                  |         |
| Hippocampus                       | p=0.01                                   |         | p<0.01                           |         |
| <b>Braak III ROIs</b>             |                                          |         |                                  |         |
| Parahippocampal                   | p<0.01                                   | p<0.01  | p<0.001                          | p<0.001 |
| Fusiform                          | p<0.001                                  | p<0.001 | p<0.001                          | p<0.001 |
| Lingual                           |                                          |         |                                  |         |
| Amygdala                          | p<0.001                                  | p<0.001 | p<0.001                          | p<0.001 |
| <b>Braak IV ROIs</b>              |                                          |         |                                  |         |
| Caudate anterior cingulate        |                                          |         |                                  |         |
| Rostral anterior cingulate        |                                          |         |                                  |         |
| Posterior cingulate               | p<0.001                                  | p<0.001 | p<0.001                          | p<0.001 |
| Isthmus cingulate                 | p<0.001                                  | p<0.01  | p<0.001                          | p<0.001 |
| Insula                            | p<0.01                                   |         | p<0.01                           |         |
| Inferior temporal                 | p<0.001                                  | p<0.001 | p<0.001                          | p<0.001 |
| Temporal pole                     | p<0.001                                  | p<0.01  | p<0.001                          | p<0.001 |
| Middle temporal                   | p<0.001                                  | p<0.001 | p<0.001                          | p<0.001 |
| <b>Braak V ROIs</b>               |                                          |         |                                  |         |
| Superior frontal                  | p<0.01                                   | p<0.01  | p<0.001                          | p<0.01  |
| Lateral orbitofrontal             | p<0.01                                   | p<0.01  | p<0.01                           | p<0.01  |
| Medial orbitofrontal              |                                          |         |                                  |         |
| Frontal pole                      |                                          |         | p<0.01                           |         |
| Caudal middle frontal             | p<0.001                                  | p<0.001 | p<0.001                          | p<0.001 |
| Rostral middle frontal            | p<0.001                                  | p<0.01  | p<0.001                          | p<0.001 |
| Pars opercularis                  | p<0.01                                   | p<0.01  | p<0.01                           | p<0.01  |
| Pars orbitalis                    | p<0.01                                   | p<0.01  | p<0.01                           | p<0.01  |
| Pars triangularis                 | p<0.01                                   | p<0.01  | p<0.01                           | p<0.01  |
| Lateral occipital                 | p<0.01                                   |         | p<0.01                           | p<0.01  |
| Supramarginal                     | p<0.001                                  | p<0.001 | p<0.001                          | p<0.001 |
| Inferior parietal                 | p<0.001                                  | p<0.001 | p<0.001                          | p<0.001 |
| Superior parietal                 | p<0.001                                  | p<0.01  | p<0.001                          | p<0.01  |
| Superior temporal                 | p<0.01                                   | p<0.01  | p<0.001                          | p<0.01  |
| Banks of superior temporal sulcus | p<0.001                                  | p<0.001 | p<0.001                          | p<0.001 |
| Transverse temporal               |                                          |         |                                  |         |
| Precuneus                         | p<0.001                                  | p<0.001 | p<0.001                          | p<0.001 |
| <b>Braak VI ROIs</b>              |                                          |         |                                  |         |

|               |        |  |        |  |
|---------------|--------|--|--------|--|
| Pericalcarine |        |  |        |  |
| Cuneus        |        |  |        |  |
| Precentral    |        |  |        |  |
| Paracentral   | p<0.01 |  | p<0.01 |  |
| Postcentral   |        |  |        |  |
